# Supplementary material
Source: PubMed Central journal article supplement (PMC2464699)
Supplement: rsbl20070073s31.pdf [file rsbl20070073s31.pdf]

Table S1 Cellulase activity in the midgut and hindgut of *N. takasagoensis* and *N. walkeri*

|                | <i>N. takasagoensis</i><br>midgut | <i>N. takasagoensis</i><br>hindgut | <i>N. walkeri</i><br>midgut | <i>N. walkeri</i><br>hindgut |
|----------------|-----------------------------------|------------------------------------|-----------------------------|------------------------------|
| Crude extract  | 0.164 ± 0.043                     | 0.039 ± 0.020                      | 0.187 ± 0.062               | 0.046 ± 0.015                |
| Pellet extract | 0.004 ± 0.004                     | 0.058 ± 0.012                      | 0.007 ± 0.006               | 0.042 ± 0.008                |
| Total          | 0.167 ± 0.047                     | 0.098 ± 0.029                      | 0.193 ± 0.067               | 0.088 ± 0.021                |

Values (units (U) per gram of termite) are means of five determinations ± s.d. One unit of activity is defined as the amount of enzyme that produces 1 μmol of reducing sugars (glucose equivalent) per minute.
