# Supplementary material
Source: PubMed Central journal article supplement (PMC2464699)
Supplement: rsbl20070073s32.pdf [file rsbl20070073s32.pdf]

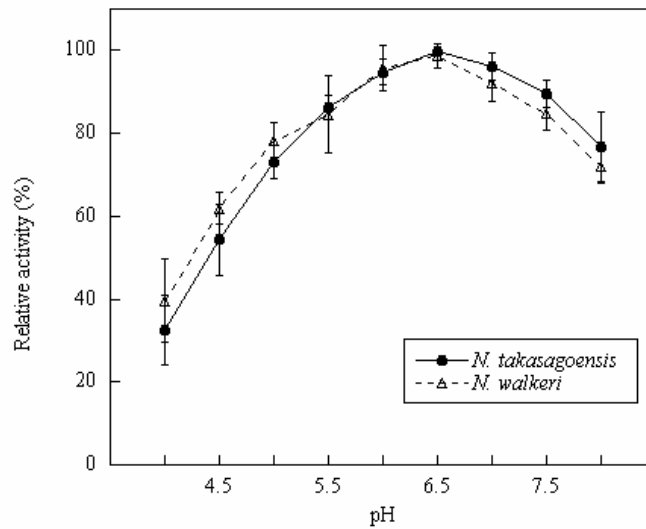

Figure S1 Effect of pH on cellulase activity in pellet extracts of the hindguts of *N. takasagoensis* and *N. walkeri*. Points are means of five determinations  $\pm$  s.d. To determine the effect of pH on cellulase activity in the hindgut, 5  $\mu$ l of hindgut pellet extract was incubated with 25  $\mu$ l of 1% carboxymethylcellulose in McIlvaine's buffer ranging from pH 4 to 8 with intervals of 0.5. The reaction was performed at 37°C for 30 min and terminated by adding 200  $\mu$ l of tetrazolium blue reagent. Photometry was performed with a microplate reader as described previously (Ni *et al.* 2005).
